# Supplementary figures and images for: Insect endosymbiont proliferation is limited by lipid availability
Source: eLife journal article supplement (doi:10.7554/elife.02964), 2014-07-15

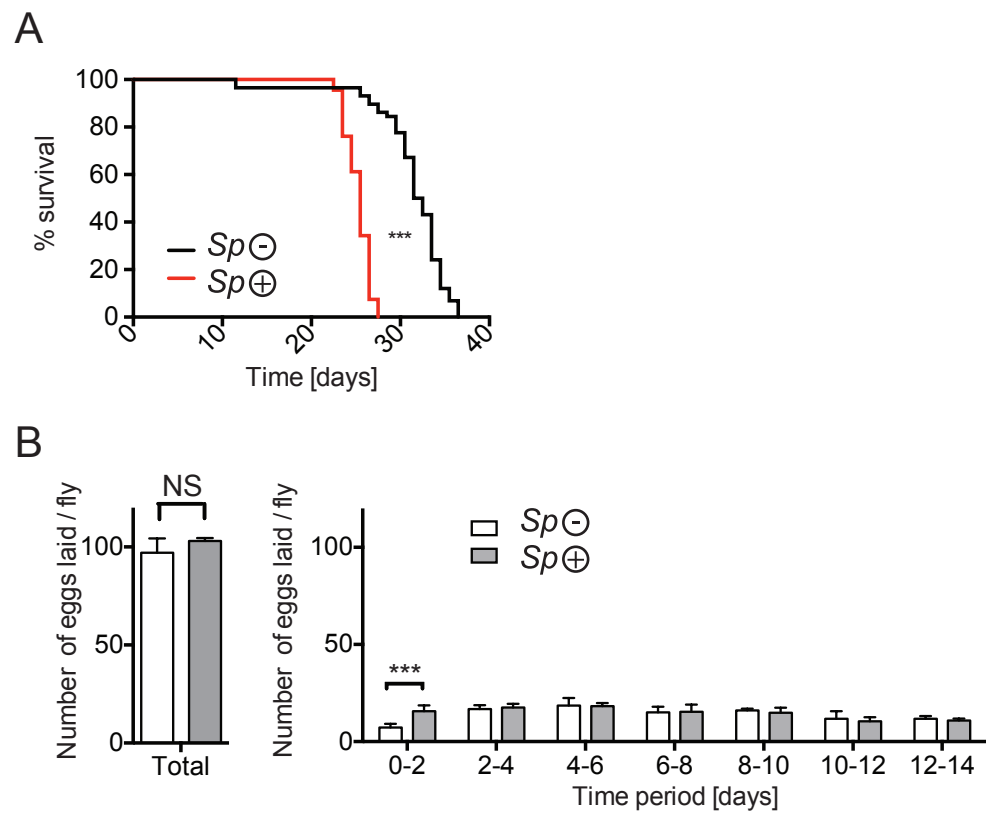

Figure 1 S1

Supplement: supp [file elife_poa_e02964_Figure_1_figure_supplement_1.pdf › elife_poa_e02964_Figure_1_figure_supplement_1.pdf]

A

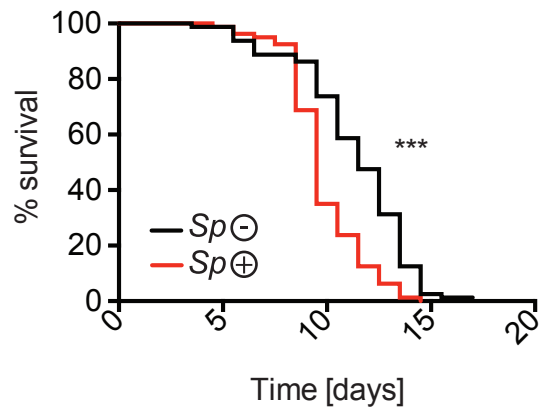

B

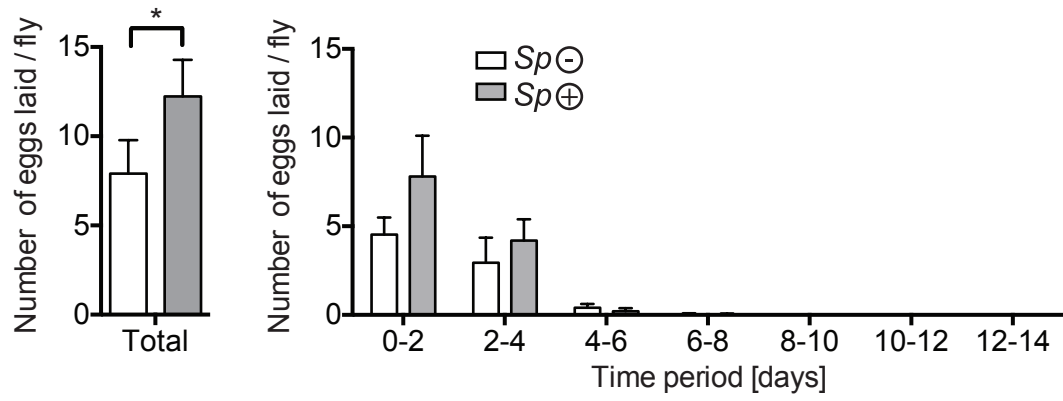

Figure 2 S1

Supplement: supp [file elife_poa_e02964_Figure_2_figure_supplement_1.pdf › elife_poa_e02964_Figure_2_figure_supplement_1.pdf]

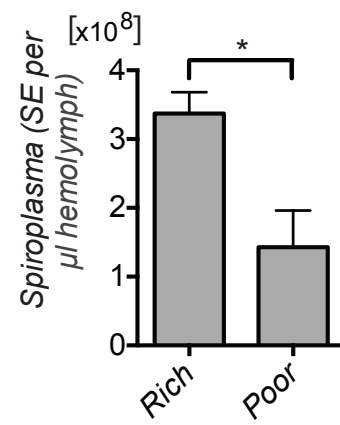

Figure 2 S2

Supplement: supp [file elife_poa_e02964_Figure_2_figure_supplement_2.pdf › elife_poa_e02964_Figure_2_figure_supplement_2.pdf]

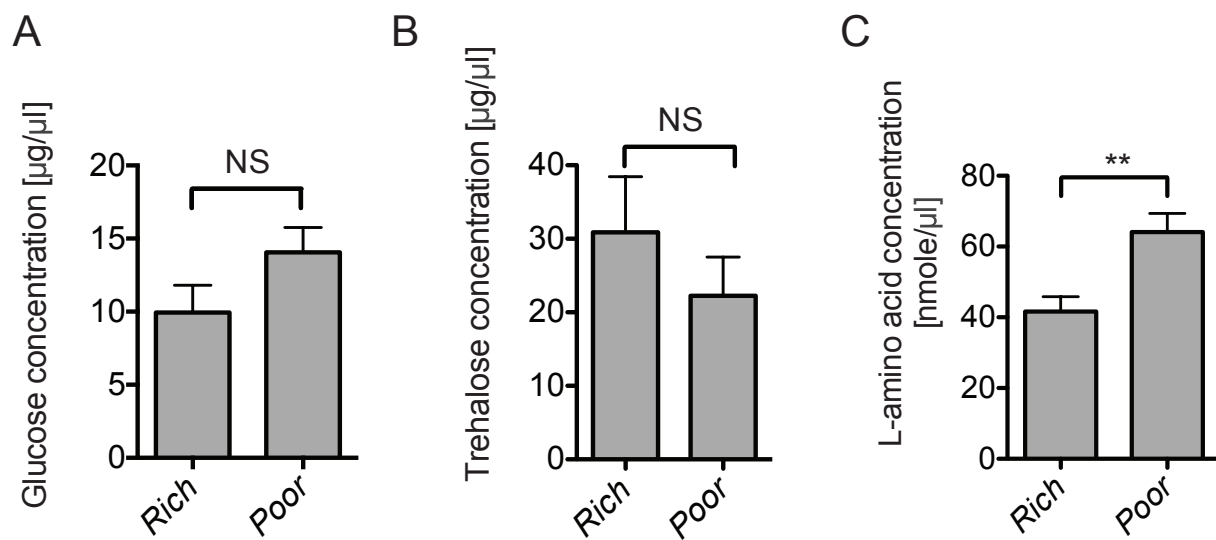

Figure 3 S1

Supplement: supp [file elife_poa_e02964_Figure_3_figure_supplement_1.pdf › elife_poa_e02964_Figure_3_figure_supplement_1.pdf]

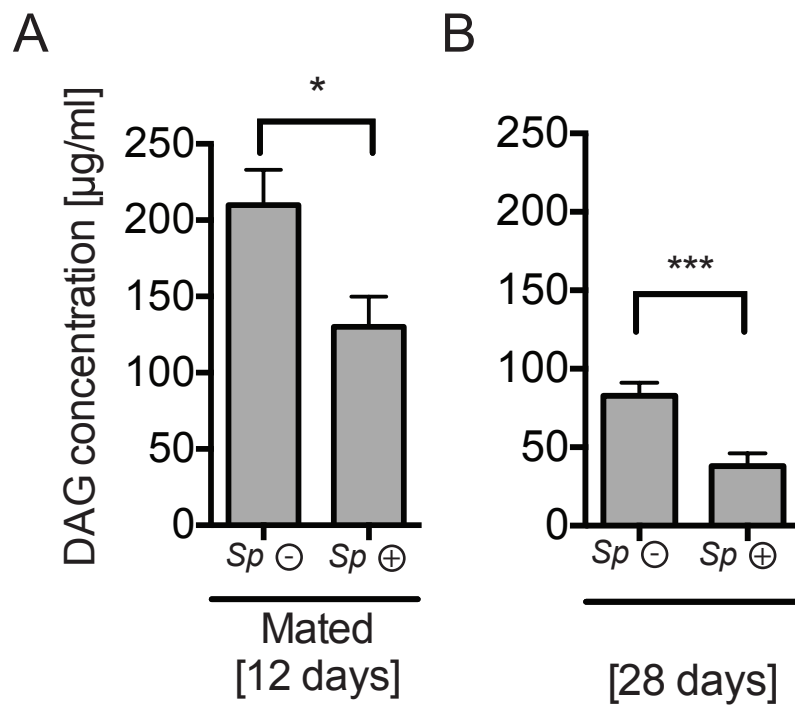

Figure 5 S1

Supplement: supp [file elife_poa_e02964_Figure_5_figure_supplement_1.pdf › elife_poa_e02964_Figure_5_figure_supplement_1.pdf]

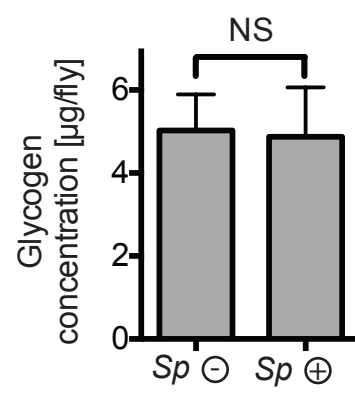

Figure 5 S2

Supplement: supp [file elife_poa_e02964_Figure_5_figure_supplement_2.pdf › elife_poa_e02964_Figure_5_figure_supplement_2.pdf]

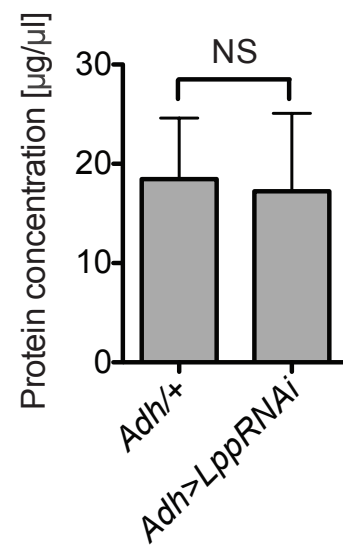

Figure 8 S1

Supplement: supp [file elife_poa_e02964_Figure_8_figure_supplement_1.pdf › elife_poa_e02964_Figure_8_figure_supplement_1.pdf]

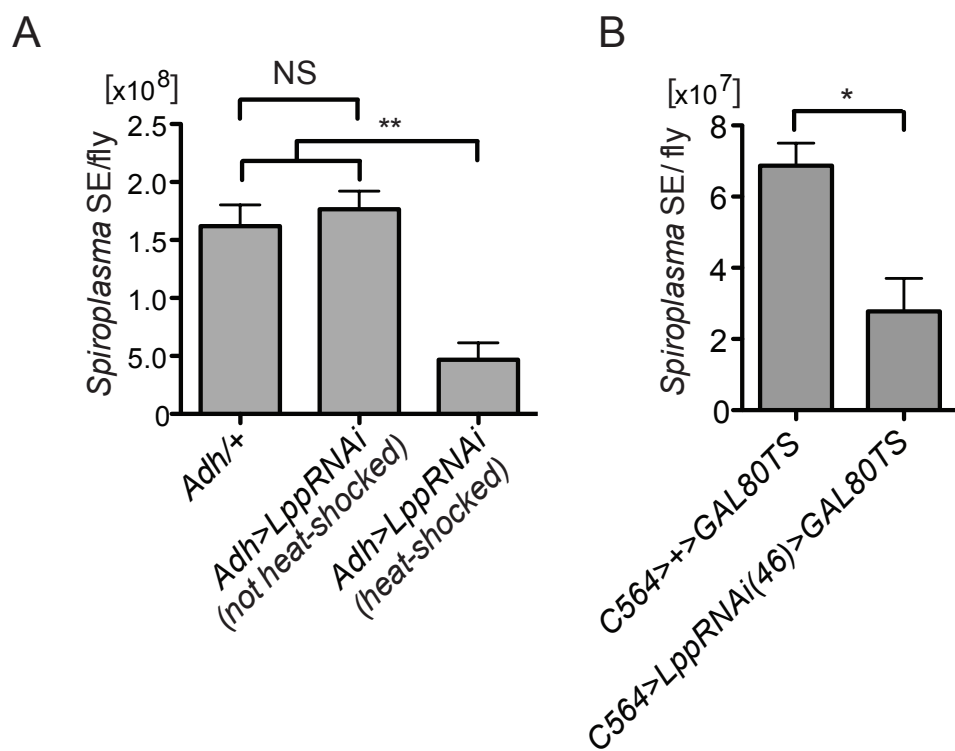

Figure 8 S2

Supplement: supp [file elife_poa_e02964_Figure_8_figure_supplement_2.pdf › elife_poa_e02964_Figure_8_figure_supplement_2.pdf]
